# Supplementary material
Source: ML conference proceedings conference paper supplement (https://aclanthology.org/2020.alw-1.21)
Supplement: OptionalSupplementaryMaterial [file 2020.alw-1.21.OptionalSupplementaryMaterial.zip]

## A Appendix

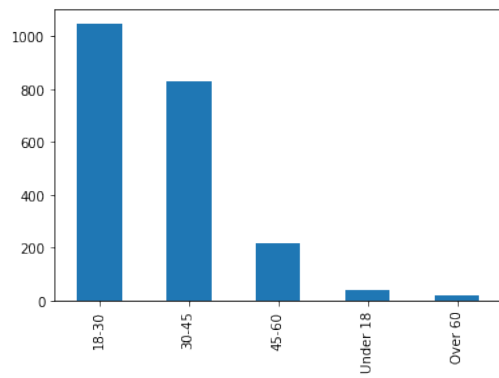

Figure 2: Annotators age group distribution

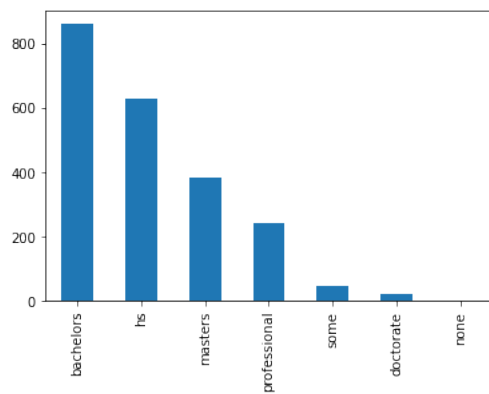

Figure 3: Annotators education level distribution
